# Supplementary material for: Effectiveness of Options for the Adaptation of Crop Farming to Climate Change in a Country of the European South
Source: Preprints.org preprint supplement (doi:10.20944/preprints202409.0835.v1), 2024-09-11
Supplement: Supplementary file 1 [file supplementary]

**SUPPLEMENTARY MATERIAL**


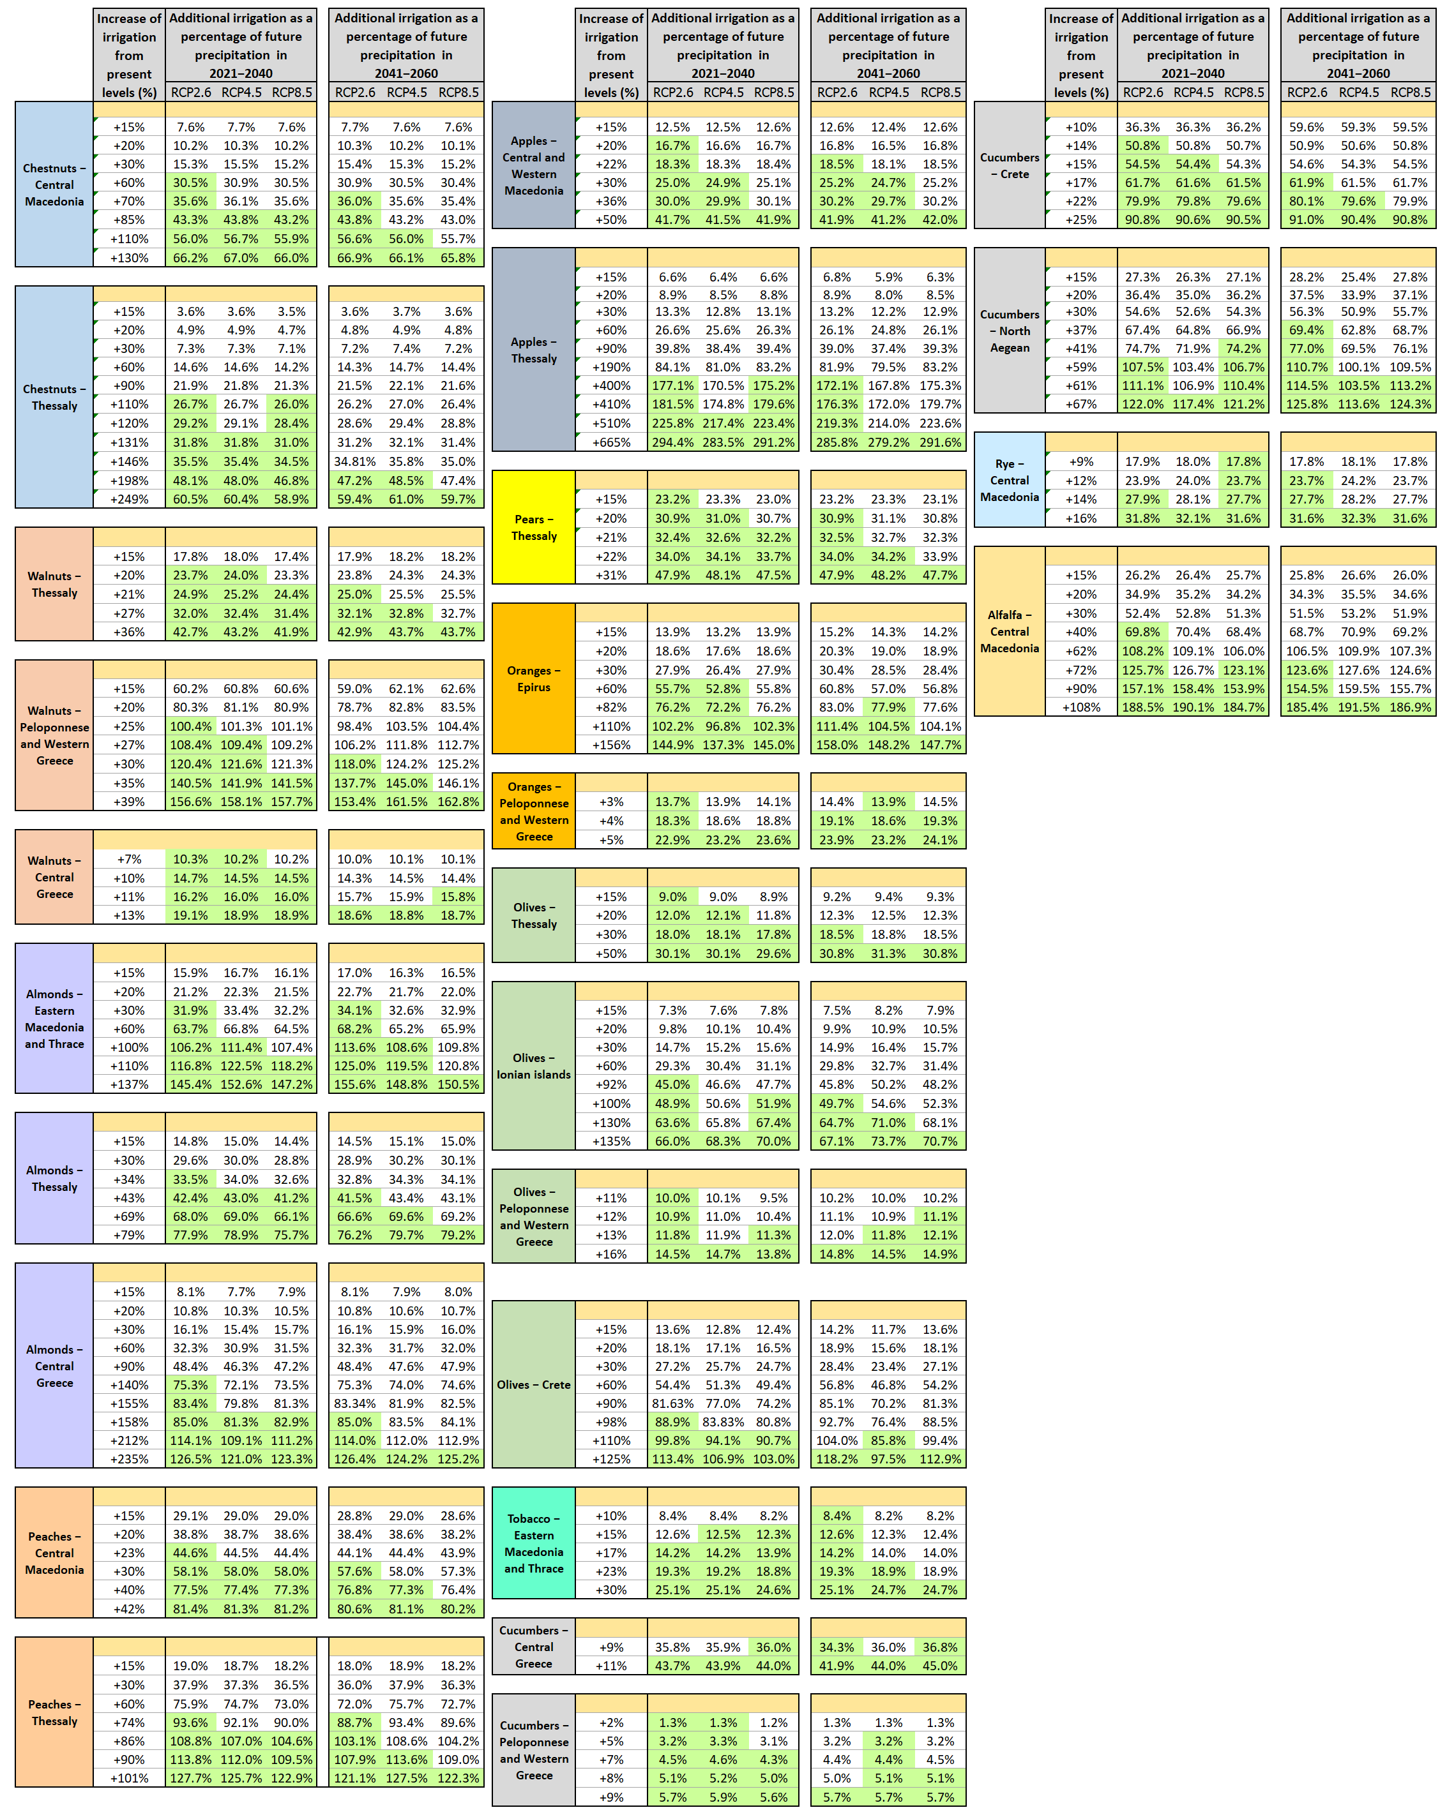


**Figure S1.** Percentage of cumulative future precipitation – during the months where precipitation is statistically significant in the statistical regression models linking crop yields with climatic parameters – to which each level of irrigation increase corresponds**.**
